# Supplementary material for: Potassium ferrous ferricyanide nanoparticles as a high capacity and ultralong life cathode material for nonaqueous potassium-ion batteries
Source: Royal Society of Chemistry journal article supplement (doi:10.1039/c7ta08139a), 2017-01-01
Supplement: c7ta08139a1.pdf [file c7ta08139a1.pdf]

## Supporting Information

### **Potassium ferrous ferricyanide nanoparticles as high capacity and ultralong life cathode material for nonaqueous potassium-ion batteries**

Shaokun Chong,<sup>a</sup> Yuanzhen Chen,<sup>a</sup> Yang Zheng,<sup>b</sup> Qiang Tan,<sup>a</sup> Chengyong Shu,<sup>a</sup> Yongning Liu<sup>\*a</sup> and Zaiping Guo<sup>b</sup>

<sup>a</sup> State Key Laboratory for Mechanical Behavior of Materials, School of Material Science and Engineering, Xi'an Jiaotong University, Xi'an 710049, PR China

<sup>b</sup> Institute for Superconducting & Electronic Materials, University of Wollongong, Wollongong, NSW 2500, Australia

---

\* Corresponding author. Tel: +86-29-8266-4602; fax: +86-29-8266-3453  
*E-mail address:* ynliu@mail.xjtu.edu.cn (Yongning Liu)

Table S1 Element contents of KFFCN.

| ICP-AES (wt %) |       | Element analysis (wt %) |       |      |
|----------------|-------|-------------------------|-------|------|
| K              | Fe    | C                       | N     | H    |
| 12.05          | 31.48 | 17.66                   | 20.85 | 1.72 |

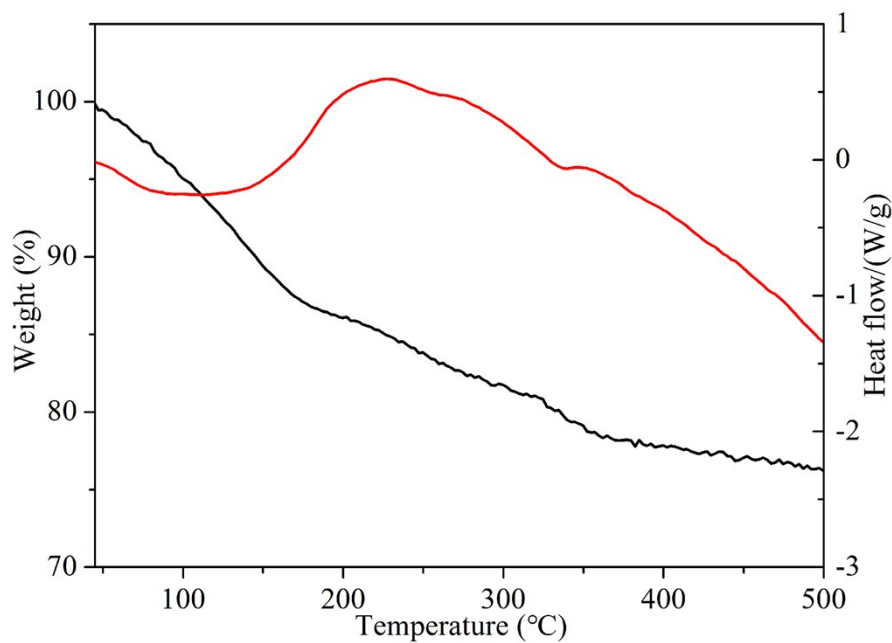

Fig. S1 TG and DSC curves of KFFCN measured at a heating rate of 10 °C min<sup>-1</sup> in nitrogen.

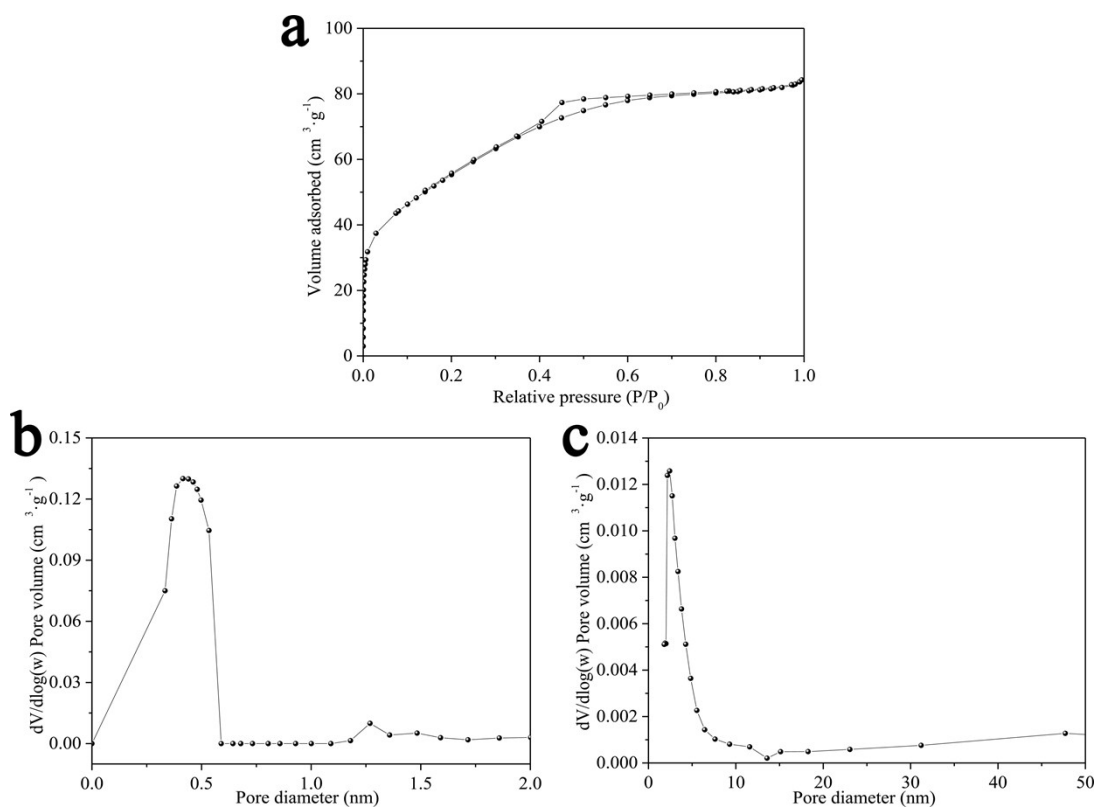

Fig. S2 a) Nitrogen adsorption-desorption isotherm of KFFCN; b) micropore size distribution; c) mesoporous size distribution.

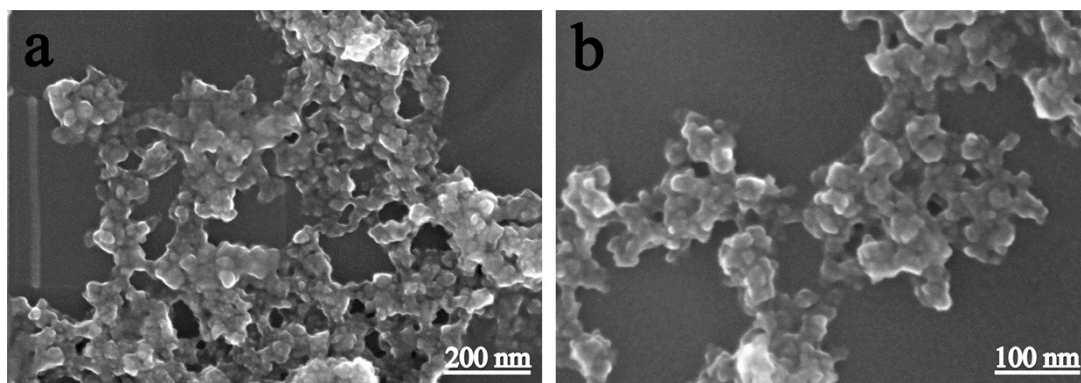

Fig. S3 SEM images of KFFCN at different magnification.

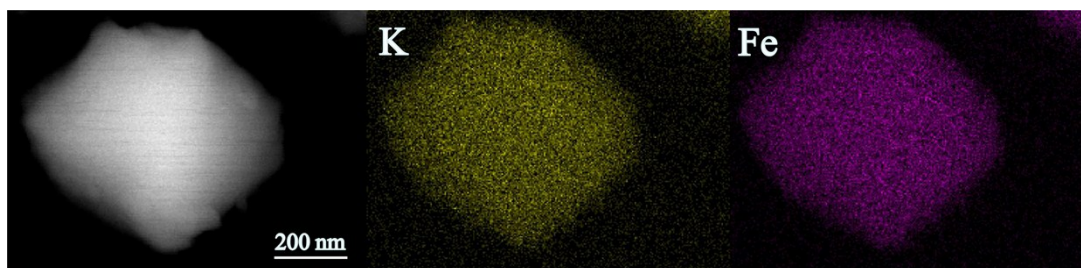

Fig. S4 EDS mapping images of KFFCN.

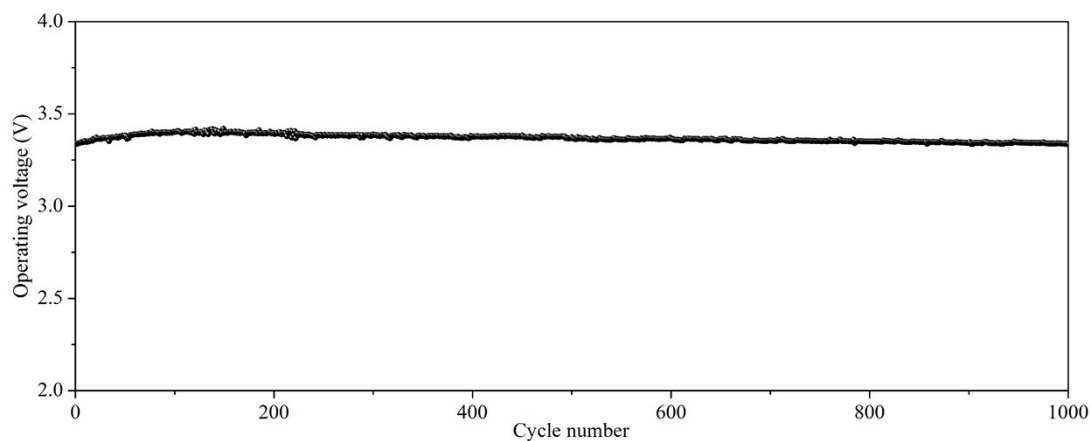

Fig. S5 Discharge operating voltage curve of KFFCN at  $100 \text{ mA} \cdot \text{g}^{-1}$  upon cycling.

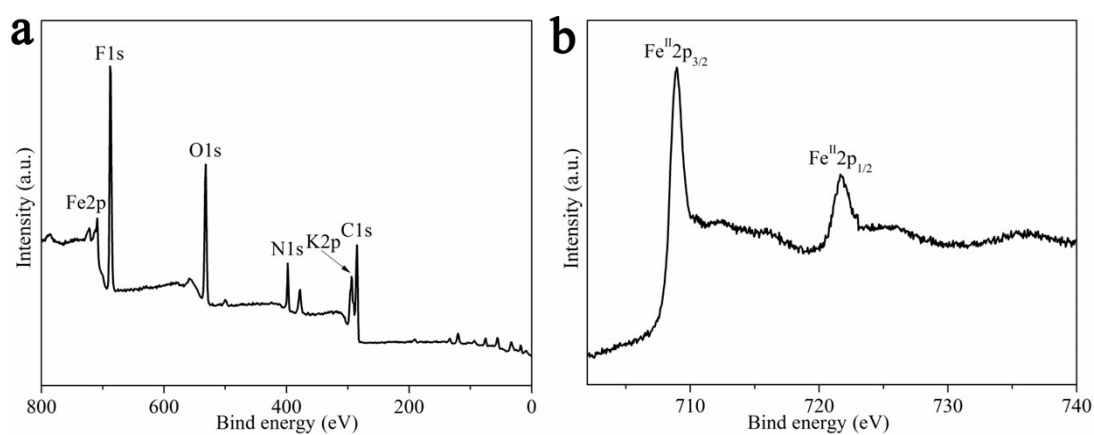

Fig. S6 Ex situ a) XPS survey spectrum; b) Fe 2p spectrum after the first cycle.

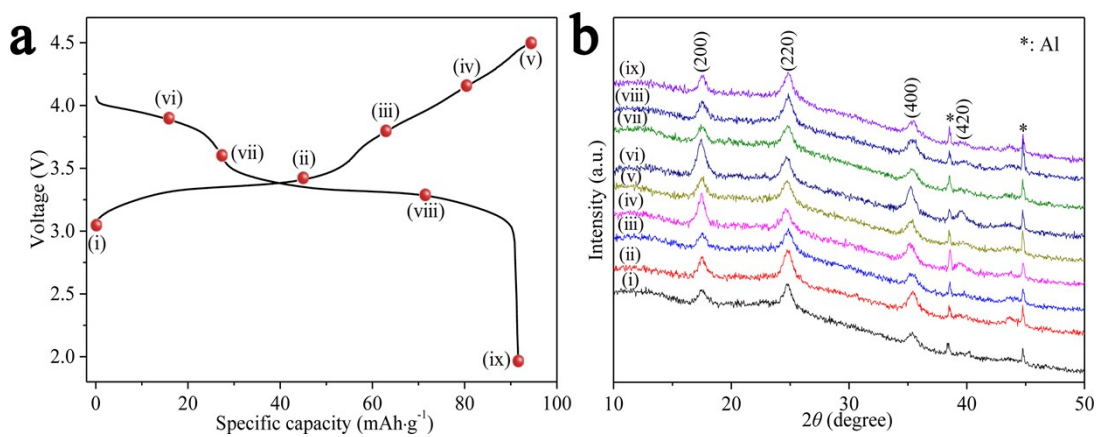

Fig. S7 a) the second charge/discharge profile at  $100 \text{ mA} \cdot \text{g}^{-1}$ ; b) ex situ XRD patterns at different states during the second cycle.

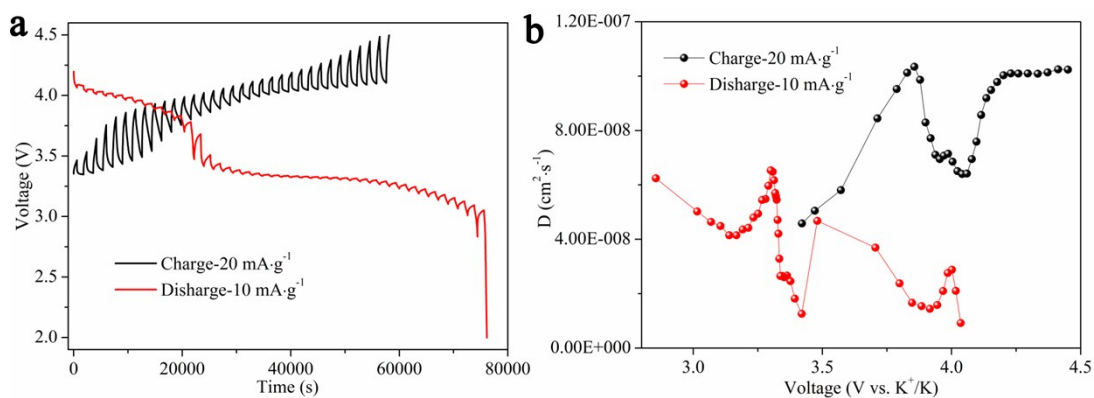

Fig. S8 a) GITT curves of the first cycle and corresponding b) K-ions diffusion coefficient ( $D_{K^+}$ ) between 2.0 and 4.5 V.

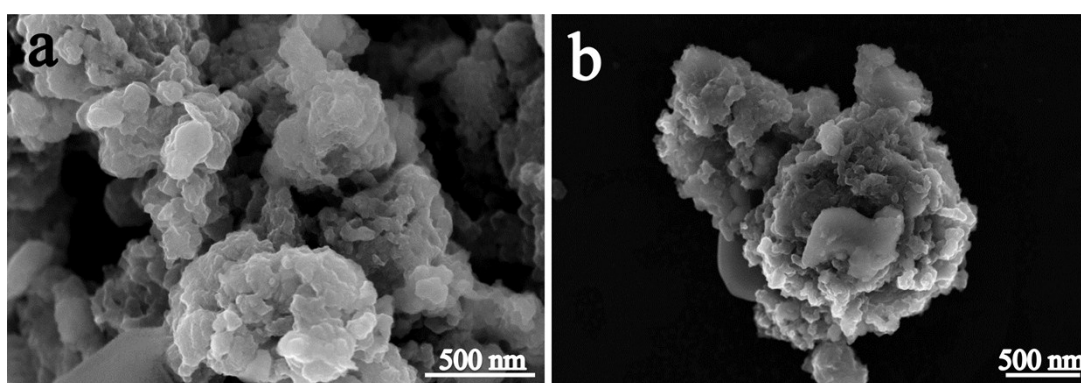

Fig. S9 Ex situ SEM image of KFFCN after a) 100 cycles and b) 1000 cycles.

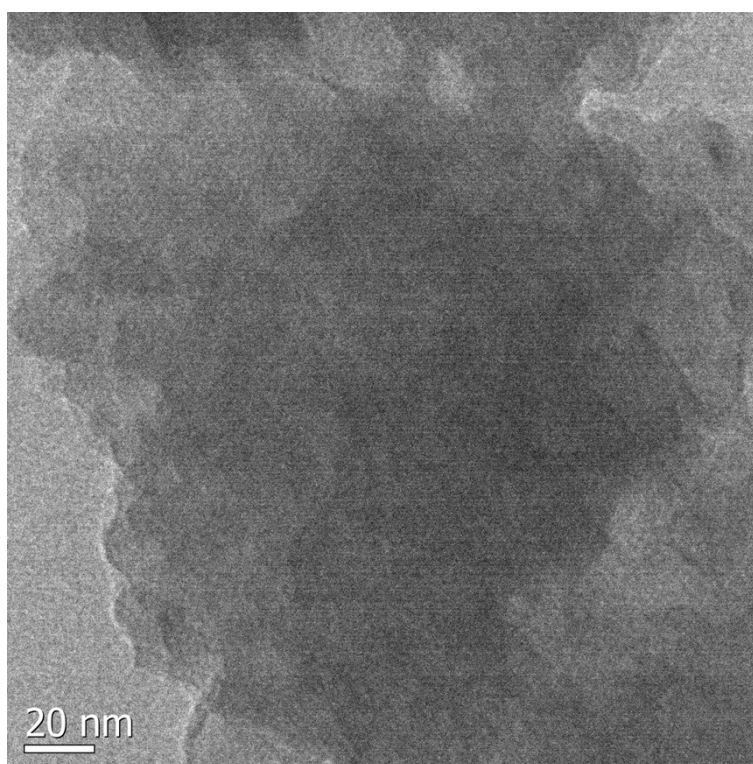

Fig. S10 Ex situ TEM image of KFFCN after 1000 cycles.

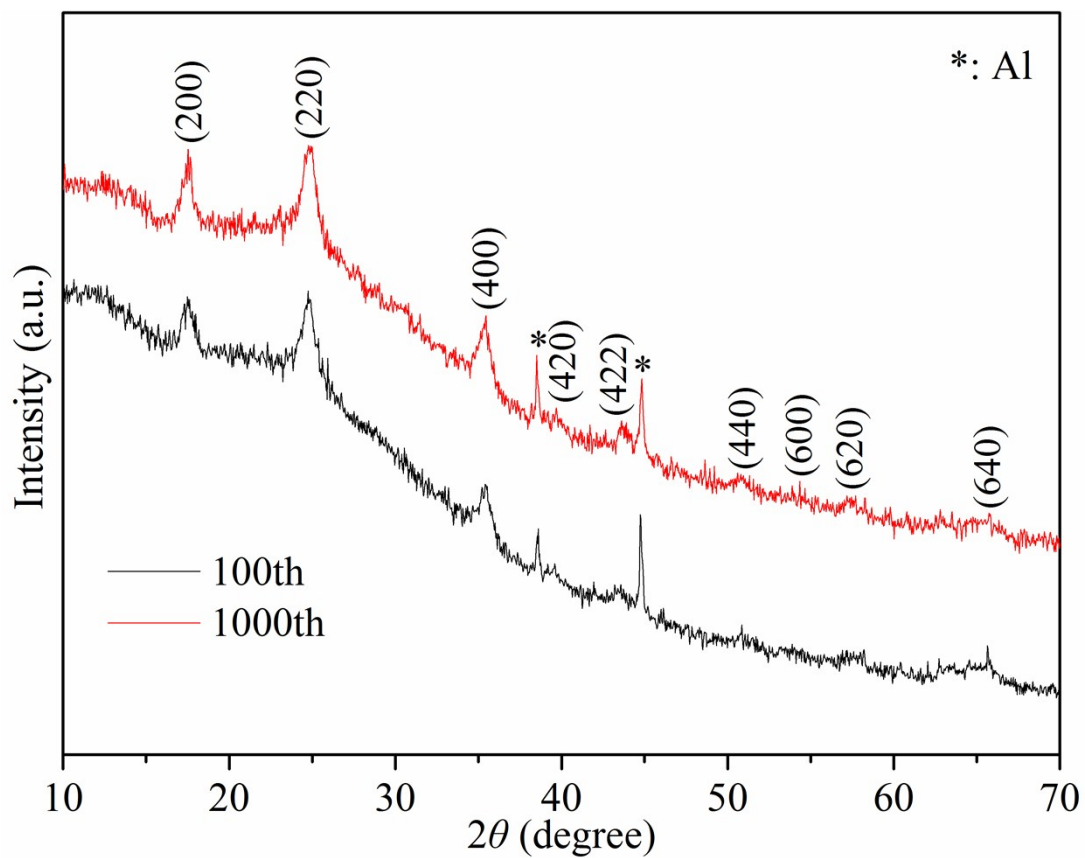

Fig. S11 Ex situ XRD patterns after 100 and 1000 for KFFCN.

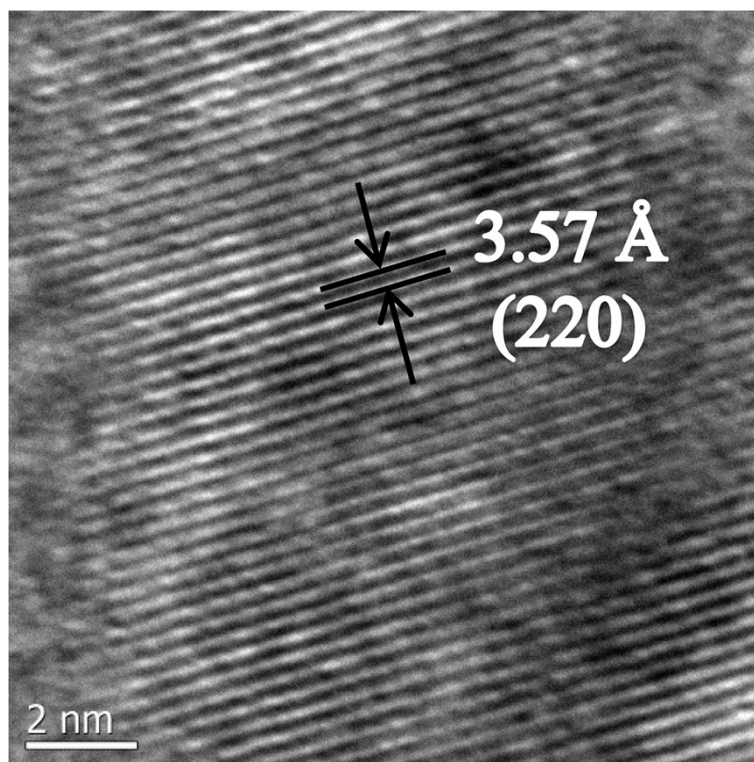

Fig. S12 Ex situ HRTEM image of single nano-particle for 100 cycled KFFCN.

Table S2 Comparison of the cycle life of some cathode materials for the nonaqueous potassium ion batteries.

| Materials                                                                                       | Current density<br>(mA·g <sup>-1</sup> ) | Initial capacity<br>(mAh·g <sup>-1</sup> ) | Cycle numbers | Capacity<br>retention (%) |
|-------------------------------------------------------------------------------------------------|------------------------------------------|--------------------------------------------|---------------|---------------------------|
| KFe[Fe(CN) <sub>6</sub> ] <sub>0.82</sub> ·2.87H <sub>2</sub> O<br>(This work)                  | 10                                       | 118.7                                      | 100           | 93.73                     |
|                                                                                                 | 100                                      | 90.7                                       | 1000          | 80.49                     |
| K <sub>0.220</sub> Fe[Fe(CN) <sub>6</sub> ] <sub>0.805</sub> ·4.01H <sub>2</sub> O <sup>1</sup> | 50                                       | 76.7                                       | 50            | 95.44                     |
|                                                                                                 | 200                                      | 60.6                                       | 150           | 86.50                     |
|                                                                                                 | 300                                      | 51.7                                       | 150           | 86.50                     |
| K <sub>1.7</sub> Fe[Fe(CN) <sub>6</sub> ] <sub>0.9</sub> <sup>2</sup>                           | 100                                      | 120.0                                      | 300           | 65.00                     |
| K <sub>1.89</sub> Mn[Fe(CN) <sub>6</sub> ] <sub>0.92</sub> ·0.75H <sub>2</sub> O <sup>3</sup>   | 1C                                       | 57.8 (1st)                                 | 100           | 147.23                    |
|                                                                                                 |                                          | 108.7 (20th)                               |               | 78.29                     |
| K <sub>1.75</sub> Mn[Fe(CN) <sub>6</sub> ] <sub>0.93</sub> ·0.16H <sub>2</sub> O <sup>4</sup>   | 30                                       | 116.6 (1st)                                | 100           | 110.63                    |
|                                                                                                 |                                          | 137.0 (5th)                                |               | 94.16                     |
| K <sub>0.7</sub> Fe <sub>0.5</sub> Mn <sub>0.5</sub> O <sub>2</sub> <sup>5</sup>                | 20                                       | 178.0                                      | 45            | 70.00                     |
|                                                                                                 | 100                                      | 114.0                                      | 60            | 89.00                     |
|                                                                                                 | 200                                      | 94.0                                       | 45            | 96.00                     |
|                                                                                                 | 500                                      | 77.1                                       | 200           | 85.00                     |
| K <sub>0.6</sub> CoO <sub>2</sub> <sup>6</sup>                                                  | 100                                      | 48.0                                       | 120           | 60.00%                    |
| K <sub>0.5</sub> MnO <sub>2</sub> <sup>7</sup>                                                  | 5                                        | 140                                        | 20            | 33.6                      |
| 3,4,9,10 perylene–tetracarboxylicacid–<br>dianhydride <sup>8</sup>                              | 10                                       | 130.0                                      | 200           | 69.23%                    |
| perylene anhydride <sup>9</sup>                                                                 | 10                                       | 131.8                                      | 300           | 47.80                     |

## References:

1. C. Zhang, Y. Xu, M. Zhou, L. Liang, H. Dong, M. Wu, Y. Yang and Y. Lei, *Adv. Funct. Mater.*, 2016, 1604307.
2. G. He and L. F. Nazar, *ACS Energy Lett.*, 2017, **2**, 1122-1127.
3. L. Xue, Y. Li, H. Gao, W. Zhou, X. Lü, W. Kaveevivitchai, A. Manthiram and J. B. Goodenough, *J. Am. Chem. Soc.*, 2017, **139**, 2164-2167.
4. X. Bie, K. Kubota, T. Hosaka, K. Chihara and S. Komaba, *J. Mater. Chem. A*, 2017, **5**, 4325-4330.
5. X. Wang, X. Xu, C. Niu, J. Meng, M. Huang, X. Liu, Z. Liu and L. Mai, *Nano Lett.*, 2016, **17**, 544.
6. H. Kim, J. C. Kim, S. H. Bo, T. Shi, D. H. Kwon and G. Ceder, *Adv. Energy Mater.*, 2017, 1700098.
7. H. Kim, D. H. Seo, J. C. Kim, S. H. Bo, L. Liu, T. Shi and G. Ceder, *Adv. Mater.*, 2017, 1702480.
8. Y. Chen, W. Luo, M. Carter, L. Zhou, J. Dai, K. Fu, S. Lacey, T. Li, J. Wan and X. Han, *Nano Energy*, 2015, **18**, 205-211.
9. Z. Xing, Z. Jian, W. Luo, Y. Qi, C. Bommier, E. S. Chong, Z. Li, L. Hu and X. Ji, *Energy Storage Mater.*, 2016, **2**, 63-68.
